# Supplementary material
Source: PubMed Central journal article supplement (PMC8130501)
Supplement: mmc1.pdf [file mmc1.pdf]

**Applied Microbiology and Biotechnology**

**Main Protease Inhibitors and Drug Surface Hotspot for the Treatment of  
COVID-19: Drug Repurposing and Molecular Docking Approach**

**Mahmudul Hasan<sup>1†</sup>, Md. Sorwer Alam Parvez<sup>2†</sup>, Kazi Faizul Azim<sup>3</sup>, Md. Abdus Shukur  
Imran<sup>1</sup>, Topu Raihan<sup>2</sup>, Airin Gulshan<sup>4</sup>, Samuel Muhit<sup>5</sup>, Rubaiat Nazneen Akhand<sup>6</sup>, Md  
Bashir Uddin<sup>7\*#</sup>, Syed Sayeem Uddin Ahmed<sup>8\*\*</sup>**

<sup>1</sup>Department of Pharmaceuticals and Industrial Biotechnology, Sylhet Agricultural University, Sylhet 3100, Bangladesh

<sup>2</sup>Department of Genetic Engineering and Biotechnology, Shahjalal University of Science and Technology, Sylhet-3114

<sup>3</sup>Department of Microbial Biotechnology, Sylhet Agricultural University, Sylhet 3100, Bangladesh

<sup>4</sup>Faculty of Biotechnology and Genetic Engineering, Sylhet Agricultural University, Sylhet 3100, Bangladesh

<sup>5</sup>School of Health Sciences, Central Michigan University, Mount Pleasant, Michigan 48859, United States

<sup>6</sup>Department of Biochemistry and Chemistry, Sylhet Agricultural University, Sylhet 3100, Bangladesh

<sup>7</sup>Department of Medicine, Sylhet Agricultural University, Sylhet 3100, Bangladesh

<sup>8</sup>Department of Epidemiology and Public Health, Sylhet Agricultural University, Sylhet 3100, Bangladesh

**\*Correspondence**

[bashir.vetmed@sau.ac.bd](mailto:bashir.vetmed@sau.ac.bd) [MB Uddin]

[ahmedssu.eph@sau.ac.bd](mailto:ahmedssu.eph@sau.ac.bd) [SSU Ahmed]

# Supplementary Tables

**Table S1.** List of all approved Main Protease Protein (MPP) inhibitors retrieved from the DrugBank of NCBI.

| <i>MPP inhibitors</i> | <i>DrugBank ID</i> | <i>Group</i>                         | <i>Description</i>                |
|-----------------------|--------------------|--------------------------------------|-----------------------------------|
| Amprenavir            | DB00701            | Approved, Investigational            | HIV protease inhibitor            |
| Asunaprevir           | DB11586            | Approved, Investigational, Withdrawn | NS3 protease inhibitor            |
| Atazanavir            | DB01072            | Approved, Investigational            | antiretroviral protease inhibitor |
| Paritaprevir          | DB09297            | Approved, Investigational            | HCV NS3/4A protease inhibitor     |
| Grazoprevir           | DB11575            | Approved                             | HCV NS3/4A protease inhibitor     |
| Glecaprevir           | DB13879            | Approved, Investigational            | HCV NS3/4A protease inhibitor     |
| Ritonavir             | DB00503            | Approved, Investigational            | HIV protease inhibitor            |
| Nelfinavir            | DB00220            | Approved                             | HIV-1 protease inhibitor          |
| Lopinavir             | DB01601            | Approved                             | antiretroviral protease inhibitor |
| Simeprevir            | DB06290            | Approved                             | HCV NS3/4A protease inhibitor     |
| Telaprevir            | DB05521            | Approved, Withdrawn                  | HCV NS3/4A protease inhibitor     |
| Indinavir             | DB00224            | Approved                             | specific HIV protease inhibitor   |
| Darunavir             | DB01264            | Approved                             | HIV protease inhibitor            |
| Fosamprenavir         | DB01319            | Approved                             | HIV protease inhibitor            |
| Saquinavir            | DB01232            | Approved, Investigational            | HIV protease inhibitor            |
| Boceprevir            | DB08873            | Approved, Withdrawn                  | HCV NS3/4A protease inhibitor     |

**Table S2.** List of the derivatives of Paritaprevir retrieved from NCBI.

| <i>PubChem ID</i> | <i>IUPAC Name</i>                                                                                                                                                                                |
|-------------------|--------------------------------------------------------------------------------------------------------------------------------------------------------------------------------------------------|
| CID 131982844     | (3S,9Z,12R,15S,17R)-N-cyclopropylsulfonyl-12-methyl-3-[(5-methylpyrazine-2-carbonyl)amino]-2,14-dioxo-17-phenanthridin-6-yloxy-1,13-diazabicyclo[13.3.0]octadec-9-ene-12-carboxamide             |
| CID 117860584     | (1S,4R,6S,7Z,14S,18R)-N-cyclopropylsulfonyl-18-(3,9-difluorophenanthridin-6-yl)oxy-14-[(1-methylpyrazole-4-carbonyl)amino]-2,15-dioxo-3,16-diazatricyclo[14.3.0.04,6]nonadec-7-ene-4-carboxamide |
| CID 144881776     | (4S,6R,10S,16Z)-N-cyclopropylsulfonyl-10-[(5-methylpyrazine-2-carbonyl)amino]-3,9-dioxo-6-phenanthridin-6-yloxy-2,8-diazatricyclo[15.2.1.04,8]icos-16-ene-1-carboxamide                          |
| CID 144881777     | (4S,6R,10S,16Z)-N-cyclopropylsulfonyl-10-[(5-methylpyrazine-2-carbonyl)amino]-3,9-dioxo-6-phenanthridin-6-yloxy-2,8-diazatricyclo[15.2.1.04,8]icos-16-ene-1-carboxamide                          |
| CID 89997958      | (1R,4S,6R,10S,16Z)-N-cyclopropylsulfonyl-10-[(5-methylpyrazine-2-carbonyl)amino]-3,9-dioxo-6-phenanthridin-6-yloxy-2,8-diazatricyclo[15.2.1.04,8]icos-16-ene-1-carboxamide                       |
| CID 90479564      | (1S,4R,6S,7Z,14S,18R)-N-cyclopropylsulfonyl-14-[(5-methylpyrazine-2-carbonyl)amino]-2,15-dioxo-18-phenanthridin-6-yloxy-3,16-diazatricyclo[14.3.0.04,6]nonadec-7-ene-4-carboxamide;dihydrate     |
| CID 117930281     | (1S,4R,6S,7Z,14S)-N-cyclopropylsulfonyl-14-[(5-methylpyrazine-2-carbonyl)amino]-2,15-dioxo-18-phenanthridin-6-yloxy-3,16-diazatricyclo[14.3.0.04,6]nonadec-7-ene-4-carboxamide                   |
| CID 126760198     | (1S,4R,7Z,14S,18R)-N-cyclopropylsulfonyl-14-[(5-methylpyrazine-2-carbonyl)amino]-2,15-dioxo-18-phenanthridin-6-yloxy-3,16-diazatricyclo[14.3.0.04,6]nonadec-7-ene-4-carboxamide                  |
| CID 130368695     | (1S,6S,7Z,14S,18R)-N-cyclopropylsulfonyl-14-[(5-methylpyrazine-2-carbonyl)amino]-2,15-dioxo-18-phenanthridin-6-yloxy-3,16-diazatricyclo[14.3.0.04,6]nonadec-7-ene-4-carboxamide                  |

|               |                                                                                                                                                                                                                        |
|---------------|------------------------------------------------------------------------------------------------------------------------------------------------------------------------------------------------------------------------|
| CID 129606829 | (1R,4S,6R,7Z,14R,18S)-N-cyclopropylsulfonyl-14-[(5-methylpyrazine-2-carbonyl)amino]-2,15-dioxo-18-phenanthridin-6-yloxy-3,16-diazatricyclo[14.3.0.0 <sup>4,6</sup> ]nonadec-7-ene-4-carboxamide                        |
| CID 134503655 | (1S,4R,7Z,14S)-N-cyclopropylsulfonyl-14-[(5-methylpyrazine-2-carbonyl)amino]-2,15-dioxo-18-phenanthridin-6-yloxy-3,16-diazatricyclo[14.3.0.0 <sup>4,6</sup> ]nonadec-7-ene-4-carboxamide                               |
| CID 91971755  | (1S,4R,6S,7Z,14S,18R)-14-[(5-methylpyrazine-2-carbonyl)amino]-2,15-dioxo-18-phenanthridin-6-yloxy-N-(2,2,3,3-tetradeuteriocyclopropyl)sulfonyl-3,16-diazatricyclo[14.3.0.0 <sup>4,6</sup> ]nonadec-7-ene-4-carboxamide |
| CID 129190351 | (1S,4R,7Z,18R)-N-cyclopropylsulfonyl-14-[(5-methylpyrazine-2-carbonyl)amino]-2,15-dioxo-18-phenanthridin-6-yloxy-3,16-diazatricyclo[14.3.0.0 <sup>4,6</sup> ]nonadec-7-ene-4-carboxamide                               |
| CID 134689630 | (7Z)-N-cyclopropylsulfonyl-14-[(5-methylpyrazine-2-carbonyl)amino]-2,15-dioxo-18-phenanthridin-6-yloxy-3,16-diazatricyclo[14.3.0.0 <sup>4,6</sup> ]nonadec-7-ene-4-carboxamide                                         |
| CID 76528926  | N-cyclopropylsulfonyl-8,8-difluoro-14-[(5-methylpyrazine-2-carbonyl)amino]-2,15-dioxo-18-phenanthridin-6-yloxy-3,16-diazatricyclo[14.3.0.0 <sup>4,6</sup> ]nonadecane-4-carboxamide                                    |
| CID 57415626  | (1S,4R,6S,14S,18R)-N-cyclopropylsulfonyl-8,8-difluoro-14-[(5-methylpyrazine-2-carbonyl)amino]-2,15-dioxo-18-phenanthridin-6-yloxy-3,16-diazatricyclo[14.3.0.0 <sup>4,6</sup> ]nonadecane-4-carboxamide                 |
| CID 132247343 | (3S,9Z,12R,15S,17R)-N-cyclopropylsulfonyl-11-methyl-3-[(5-methylpyrazine-2-carbonyl)amino]-2,14-dioxo-17-phenanthridin-6-yloxy-1,13-diazabicyclo[13.3.0]octadec-9-ene-12-carboxamide                                   |
| CID 123539122 | N-cyclopropylsulfonyl-9,9-difluoro-12-methyl-3-[(5-methylpyrazine-2-carbonyl)amino]-2,14-dioxo-17-phenanthridin-6-yloxy-1,13-diazabicyclo[13.3.0]octadecane-12-carboxamide                                             |
| CID 68500653  | (1S,4R,6S,14S,18R)-N-cyclopropylsulfonyl-14-[(5-methylpyrazine-2-carbonyl)amino]-2,15-dioxo-18-phenanthridin-6-yloxy-3,16-diazatricyclo[14.3.0.0 <sup>4,6</sup> ]nonadec-7-ene-4-carboxamide                           |

|               |                                                                                                                                                                                                                                                         |
|---------------|---------------------------------------------------------------------------------------------------------------------------------------------------------------------------------------------------------------------------------------------------------|
| CID 139266795 | <i>N</i> -cyclopropylsulfonyl-14-[(5-methylpyrazine-2-carbonyl)amino]-2,15-dioxo-18-phenanthridin-6-yloxy-3,16-diazatricyclo[14.3.0.0 <sup>4,6</sup> ]nonadec-7-ene-4-carboxamide;dihydrate                                                             |
| CID 140642412 | (7 <i>Z</i> )- <i>N</i> -cyclopropylsulfonyl-2,15-dioxo-18-phenanthridin-6-yloxy-14-(pyrazine-2-carbonylamino)-3,16-diazatricyclo[14.3.0.0 <sup>4,6</sup> ]nonadec-7-ene-4-carboxamide                                                                  |
| CID 75093025  | <i>N</i> -cyclopropylsulfonyl-14-[(5-methylpyrazine-2-carbonyl)amino]-2,15-dioxo-18-phenanthridin-6-yloxy-3,16-diazatricyclo[14.3.0.0 <sup>4,6</sup> ]nonadec-7-ene-4-carboxamide                                                                       |
| CID 123207199 | <i>N</i> -cyclopropylsulfonyl-14-[(5-methylpyrazine-2-carbonyl)amino]-2-oxo-18-phenanthridin-6-yloxy-3,16-diazatricyclo[14.3.0.0 <sup>4,6</sup> ]nonadec-7-ene-4-carboxamide                                                                            |
| CID 45110641  | (1 <i>S</i> ,4 <i>R</i> ,6 <i>S</i> ,7 <i>Z</i> ,14 <i>S</i> ,18 <i>R</i> )- <i>N</i> -cyclopropylsulfonyl-2,15-dioxo-18-phenanthridin-6-yloxy-14-(pyridazine-4-carbonylamino)-3,16-diazatricyclo[14.3.0.0 <sup>4,6</sup> ]nonadec-7-ene-4-carboxamide  |
| CID 126970090 | (1 <i>R</i> ,4 <i>R</i> ,6 <i>S</i> ,14 <i>S</i> ,18 <i>R</i> )- <i>N</i> -cyclopropylsulfonyl-14-[(5-methylpyrazine-2-carbonyl)amino]-2,15-dioxo-18-phenanthridin-6-yloxy-3,16-diazatricyclo[14.3.0.0 <sup>4,6</sup> ]nonadec-7-ene-4-carboxamide      |
| CID 134693118 | (1 <i>S</i> ,4 <i>R</i> )- <i>N</i> -cyclopropylsulfonyl-14-[(5-methylpyrazine-2-carbonyl)amino]-2,15-dioxo-18-phenanthridin-6-yloxy-3,16-diazatricyclo[14.3.0.0 <sup>4,6</sup> ]nonadec-7-ene-4-carboxamide                                            |
| CID 145142292 | (1 <i>S</i> ,4 <i>R</i> ,8 <i>Z</i> ,15 <i>S</i> ,19 <i>R</i> )- <i>N</i> -cyclopropylsulfonyl-15-[(5-methylpyrazine-2-carbonyl)amino]-2,16-dioxo-19-phenanthridin-6-yloxy-3,17-diazatricyclo[15.3.0.0 <sup>4,7</sup> ]icosa-5,8-diene-4-carboxamide    |
| CID 134322927 | (3 <i>S</i> ,9 <i>Z</i> ,12 <i>R</i> ,15 <i>S</i> ,17 <i>R</i> )- <i>N</i> -cyclopropylsulfonyl-11,12-dimethyl-3-[(5-methylpyrazine-2-carbonyl)amino]-2,14-dioxo-17-(phenanthridin-6-yloxymethyl)-1,13-diazabicyclo[13.3.0]octadec-9-ene-12-carboxamide |
| CID 67985746  | (1 <i>S</i> ,4 <i>R</i> ,7 <i>Z</i> ,18 <i>R</i> )- <i>N</i> -cyclopropylsulfonyl-2,15-dioxo-18-phenanthridin-6-yloxy-14-(pyrazine-2-carbonylamino)-3,16-diazatricyclo[14.3.0.0 <sup>4,6</sup> ]nonadec-7-ene-4-carboxamide                             |

|               |                                                                                                                                                                                                                                                                          |
|---------------|--------------------------------------------------------------------------------------------------------------------------------------------------------------------------------------------------------------------------------------------------------------------------|
| CID 68496388  | (1 <i>S</i> ,4 <i>R</i> ,6 <i>S</i> ,14 <i>S</i> ,18 <i>R</i> )- <i>N</i> -cyclopropylsulfonyl-2,15-dioxo-18-phenanthridin-6-yloxy-14-(pyridazine-4-carbonylamino)-3,16-diazatricyclo[14.3.0.0 <sup>4,6</sup> ]nonadec-7-ene-4-carboxamide                               |
| CID 45110639  | (1 <i>S</i> ,4 <i>R</i> ,6 <i>S</i> ,7 <i>Z</i> ,14 <i>S</i> ,18 <i>R</i> )- <i>N</i> -cyclopropylsulfonyl-2,15-dioxo-18-phenanthridin-6-yloxy-14-(pyrazine-2-carbonylamino)-3,16-diazatricyclo[14.3.0.0 <sup>4,6</sup> ]nonadec-7-ene-4-carboxamide                     |
| CID 144678769 | (1 <i>S</i> ,4 <i>S</i> ,7 <i>Z</i> ,14 <i>S</i> ,18 <i>R</i> )- <i>N</i> -cyclopropylsulfonyl-5-methylidene-14-[(5-methylpyrazine-2-carbonyl)amino]-2,15-dioxo-18-(phenanthridin-6-yloxymethyl)-3,16-diazatricyclo[14.3.0.0 <sup>4,6</sup> ]nonadec-7-ene-4-carboxamide |
| CID 68498031  | (1 <i>S</i> ,4 <i>R</i> ,6 <i>R</i> ,7 <i>Z</i> ,14 <i>S</i> ,18 <i>R</i> )- <i>N</i> -cyclopropylsulfonyl-14-[(5-methylpyrazine-2-carbonyl)amino]-2,15-dioxo-18-phenanthridin-6-yloxy-3,16-diazatricyclo[14.3.0.0 <sup>4,6</sup> ]nonadec-7-ene-4-carboxamide           |
| CID 132207185 | (1 <i>S</i> ,4 <i>R</i> ,7 <i>Z</i> ,14 <i>S</i> ,18 <i>R</i> )- <i>N</i> -cyclopropylsulfonyl-14-[(5-methylpyrazine-2-carbonyl)amino]-2,15-dioxo-18-(phenanthridin-6-yloxymethyl)-3,16-diazatricyclo[14.3.0.0 <sup>4,6</sup> ]nonadec-7-ene-4-carboxamide               |
| CID 123457581 | <i>N</i> -cyclopropylsulfonyl-8,8-difluoro-5-methyl-14-[(5-methylpyrazine-2-carbonyl)amino]-2,15-dioxo-18-phenanthridin-6-yloxy-3,16-diazatricyclo[14.3.0.0 <sup>4,6</sup> ]nonadecane-4-carboxamide                                                                     |
| CID 68494543  | <i>N</i> -ethylethanamine;(1 <i>S</i> ,4 <i>R</i> ,6 <i>S</i> ,7 <i>Z</i> ,14 <i>S</i> ,18 <i>R</i> )-14-[(5-methylpyrazine-2-carbonyl)amino]-2,15-dioxo-18-phenanthridin-6-yloxy-3,16-diazatricyclo[14.3.0.0 <sup>4,6</sup> ]nonadec-7-ene-4-carboxylic acid            |
| CID 68494548  | (1 <i>S</i> ,4 <i>R</i> ,6 <i>S</i> ,14 <i>S</i> ,18 <i>R</i> )-14-[(5-methylpyrazine-2-carbonyl)amino]-2,15-dioxo-18-phenanthridin-6-yloxy-3,16-diazatricyclo[14.3.0.0 <sup>4,6</sup> ]nonadec-7-ene-4-carboxylic acid                                                  |
| CID 140642415 | (7 <i>Z</i> )- <i>N</i> -cyclopropylsulfonyl-2,15-dioxo-18-phenanthridin-6-yloxy-14-(pyridazine-4-carbonylamino)-3,16-diazatricyclo[14.3.0.0 <sup>4,6</sup> ]nonadec-7-ene-4-carboxamide                                                                                 |
| CID 144411760 | (1 <i>S</i> ,4 <i>S</i> ,15 <i>S</i> ,19 <i>R</i> )- <i>N</i> -cyclopropylsulfonyl-9,9-difluoro-15-[(5-methylpyrazine-2-carbonyl)amino]-2,16-dioxo-19-phenanthridin-6-yloxy-3,17-diazatricyclo[15.3.0.0 <sup>4,7</sup> ]icos-5-yne-4-carboxamide                         |

|               |                                                                                                                                                                                                                                                                      |
|---------------|----------------------------------------------------------------------------------------------------------------------------------------------------------------------------------------------------------------------------------------------------------------------|
| CID 144411796 | (1 <i>S</i> ,4 <i>R</i> ,14 <i>S</i> ,18 <i>R</i> )- <i>N</i> -cyclopropylsulfonyl-8,8-difluoro-5-methyl-14-[(5-methylpyrazine-2-carbonyl)amino]-2,15-dioxo-18-phenanthridin-6-yloxy-3,16-diazatricyclo[14.3.0.0 <sup>4,6</sup> ]nonadecane-4-carboxamide            |
| CID 123172379 | <i>N</i> -cyclopropylsulfonyl-12-methyl-3-[(5-methylpyrazine-2-carbonyl)amino]-2,14-dioxo-17-phenanthridin-6-yloxy-1,13-diazabicyclo[13.3.0]octadec-9-ene-12-carboxamide                                                                                             |
| CID 58001490  | <i>N</i> -[(2 <i>S</i> )-1-[(2 <i>S</i> )-2-[[1 <i>R</i> ,2 <i>S</i> )-1-(cyclopropylsulfonylcarbamoyl)-2-ethenylcyclopropyl]carbamoyl]-4-(7-methoxy-2-phenylquinolin-4-yl)oxypyrrolidin-1-yl]-3-[methyl(prop-2-enoyl)amino]-1-oxopropan-2-yl]pyrazine-2-carboxamide |
| CID 123747270 | <i>N</i> -cyclopropylsulfonyl-6-methylidene-15-[(5-methylpyrazine-2-carbonyl)amino]-2,16-dioxo-19-phenanthridin-6-yloxy-3,17-diazatricyclo[15.3.0.0 <sup>4,7</sup> ]icos-8-ene-4-carboxamide                                                                         |
| CID 139598190 | (1 <i>S</i> ,4 <i>R</i> ,14 <i>S</i> ,18 <i>R</i> )-14-[(5-methylpyrazine-2-carbonyl)amino]-2,15-dioxo-18-phenanthridin-6-yloxy-3,16-diazatricyclo[14.3.0.0 <sup>4,6</sup> ]nonadec-7-ene-4-carboxylic acid                                                          |
| CID 77506125  | 3- <i>O</i> - <i>tert</i> -butyl 4- <i>O</i> -ethyl 14-[(5-methylpyrazine-2-carbonyl)amino]-2,15-dioxo-18-phenanthridin-6-yloxy-3,16-diazatricyclo[14.3.0.0 <sup>4,6</sup> ]nonadec-7-ene-3,4-dicarboxylate                                                          |
| CID 87473268  | (1 <i>S</i> ,4 <i>R</i> ,6 <i>R</i> ,7 <i>E</i> ,14 <i>S</i> ,18 <i>R</i> )- <i>N</i> -cyclopropylsulfonyl-14-[(5-methylpyrazine-2-carbonyl)amino]-2,15-dioxo-18-phenanthridin-6-yloxy-3,16-diazatricyclo[14.3.0.0 <sup>4,6</sup> ]nonadec-7-ene-4-carboxamide       |
| CID 133548468 | (1 <i>R</i> ,4 <i>S</i> ,6 <i>R</i> ,7 <i>E</i> ,14 <i>R</i> ,18 <i>S</i> )- <i>N</i> -cyclopropylsulfonyl-14-[(5-methylpyrazine-2-carbonyl)amino]-2,15-dioxo-18-phenanthridin-6-yloxy-3,16-diazatricyclo[14.3.0.0 <sup>4,6</sup> ]nonadec-7-ene-4-carboxamide       |
| CID 123942813 | ethyl (1 <i>S</i> ,4 <i>R</i> ,6 <i>S</i> ,14 <i>S</i> ,18 <i>R</i> )-14-[(5-methylpyrazine-2-carbonyl)amino]-2,15-dioxo-18-phenanthridin-6-yloxy-3,16-diazatricyclo[14.3.0.0 <sup>4,6</sup> ]nonadec-7-ene-4-carboxylate                                            |
| CID 68499876  | (1 <i>S</i> ,4 <i>R</i> ,6 <i>S</i> ,7 <i>Z</i> ,14 <i>S</i> ,18 <i>R</i> )-14-amino- <i>N</i> -cyclopropylsulfonyl-2,15-dioxo-18-phenanthridin-6-yloxy-3,16-diazatricyclo[14.3.0.0 <sup>4,6</sup> ]nonadec-7-ene-4-carboxamide                                      |

|               |                                                                                                                                                                                                                                                                                  |
|---------------|----------------------------------------------------------------------------------------------------------------------------------------------------------------------------------------------------------------------------------------------------------------------------------|
| CID 143897349 | (1 <i>S</i> ,4 <i>R</i> ,6 <i>R</i> ,14 <i>S</i> ,18 <i>R</i> )-14-anilino- <i>N</i> -cyclopropylsulfonyl-18-isoquinolin-1-yloxy-2,15-dioxo-3,16-diazatricyclo[14.3.0.0 <sup>4,6</sup> ]nonadecane-4-carboxamide                                                                 |
| CID 87474442  | (1 <i>S</i> ,4 <i>R</i> ,6 <i>S</i> ,7 <i>E</i> ,14 <i>S</i> ,18 <i>R</i> )-14-amino- <i>N</i> -cyclopropylsulfonyl-2,15-dioxo-18-phenanthridin-6-yloxy-3,16-diazatricyclo[14.3.0.0 <sup>4,6</sup> ]nonadec-7-ene-4-carboxamide                                                  |
| CID 123706840 | <i>N</i> -cyclopropylsulfonyl-5-methylidene-14-[(5-methylpyrazine-2-carbonyl)amino]-2,15-dioxo-18-phenanthridin-6-yloxy-3,16-diazatricyclo[14.3.0.0 <sup>4,6</sup> ]nonadec-7-ene-4-carboxamide                                                                                  |
| CID 123764424 | <i>N</i> -cyclopropylsulfonyl-15-[(5-methylpyrazine-2-carbonyl)amino]-2,16-dioxo-19-phenanthridin-6-yloxy-3,17-diazatricyclo[15.3.0.0 <sup>4,7</sup> ]icos-8-ene-4-carboxamide                                                                                                   |
| CID 144881773 | <i>N</i> -[(1 <i>S</i> ,4 <i>R</i> ,7 <i>Z</i> ,14 <i>S</i> ,18 <i>R</i> )-18-(7,8-dihydrophenanthridin-6-yloxy)-2,15-dioxo-3,16-diazatricyclo[14.3.0.0 <sup>4,6</sup> ]nonadec-7-en-14-yl]-5-methylpyrazine-2-carboxamide                                                       |
| CID 44180178  | <i>N</i> -[(2 <i>S</i> )-1-[(2 <i>S</i> ,4 <i>R</i> )-2-[[1 <i>R</i> ,2 <i>S</i> )-1-(cyclopropylsulfonylcarbamoyl)-2-ethenylcyclopropyl]carbamoyl]-4-(7-methoxy-2-phenylquinolin-4-yl)oxypyrrolidin-1-yl]-3-[methyl(prop-2-enoyl)amino]-1-oxopropan-2-yl]pyrazine-2-carboxamide |
| CID 131982843 | (1 <i>S</i> ,4 <i>R</i> ,8 <i>Z</i> ,15 <i>S</i> ,19 <i>R</i> )- <i>N</i> -cyclopropylsulfonyl-15-[(5-methylpyrazine-2-carbonyl)amino]-2,16-dioxo-19-phenanthridin-6-yloxy-3,17-diazatricyclo[15.3.0.0 <sup>4,7</sup> ]icos-8-ene-4-carboxamide                                  |
| CID 73211765  | (1 <i>S</i> ,4 <i>R</i> ,6 <i>S</i> ,7 <i>Z</i> ,14 <i>S</i> ,18 <i>R</i> )- <i>N</i> -cyclopropylsulfonyl-14-[(5-methylpyrazine-2-carbonyl)amino]-2,15-dioxo-18-phenanthridin-6-yloxy-3,16-diazatricyclo[14.3.0.0 <sup>4,6</sup> ]nonadec-7-ene-4-carboxamide;hydrate           |
| CID 89997539  | (1 <i>S</i> ,4 <i>R</i> ,6 <i>S</i> ,7 <i>Z</i> ,18 <i>R</i> )-1-[6-(cyclopropylsulfonylcarbamoyl)-3-methylpyrazin-2-yl]-2,15-dioxo-18-phenanthridin-6-yloxy-3,16-diazatricyclo[14.3.0.0 <sup>4,6</sup> ]nonadec-7-ene-4-carboxamide                                             |
| CID 123658396 | <i>N</i> -cyclopropylsulfonyl-12-ethyl-3-[(5-methylpyrazine-2-carbonyl)amino]-2,14-dioxo-17-phenanthridin-6-yloxy-1,13-diazabicyclo[13.3.0]octadec-9-ene-12-carboxamide                                                                                                          |



|               |                                                                                                                                                                                                                                                                                                                                                           |
|---------------|-----------------------------------------------------------------------------------------------------------------------------------------------------------------------------------------------------------------------------------------------------------------------------------------------------------------------------------------------------------|
| CID 16075882  | <i>tert</i> -butyl <i>N</i> -[(2 <i>S</i> )-1-[(2 <i>S</i> ,4 <i>R</i> )-2-[[1-(1 <i>R</i> ,2 <i>S</i> )-1-(cyclopropylsulfonylcarbamoyl)-2-ethenylcyclopropyl]carbamoyl]-4-(3-pyrazin-2-ylisoquinolin-1-yl)oxypyrrolidin-1-yl]-3,3-dimethyl-1-oxobutan-2-yl]carbamate                                                                                    |
| CID 23595603  | <i>tert</i> -butyl <i>N</i> -[1-[2-[[1-(cyclopropylsulfonylcarbamoyl)-2-ethenylcyclopropyl]carbamoyl]-4-(3-pyrazin-2-ylisoquinolin-1-yl)oxypyrrolidin-1-yl]-3,3-dimethyl-1-oxobutan-2-yl]carbamate                                                                                                                                                        |
| CID 123202053 | <i>N</i> -[2-ethenyl-1-[(1-methylcyclopropyl)sulfonylcarbamoyl]cyclopropyl]-22,25-dioxo-11-pyridin-4-yl-2,21-dioxa-4,23,26-triazapentacyclo[24.2.1.0 <sup>3,12</sup> .0 <sup>5,10</sup> .0 <sup>18,20</sup> ]nonacos-3,5,7,9,11-pentaene-27-carboxamide                                                                                                   |
| CID 87476180  | (1 <i>S</i> ,4 <i>R</i> ,6 <i>S</i> ,7 <i>E</i> ,14 <i>S</i> ,18 <i>R</i> )- <i>N</i> -cyclopropylsulfonyl-2,15-dioxo-18-phenanthridin-6-yloxy-14-(pyrazine-2-carbonylamino)-3,16-diazatricyclo[14.3.0.0 <sup>4,6</sup> ]nonadec-7-ene-4-carboxamide                                                                                                      |
| CID 87475090  | (1 <i>S</i> ,4 <i>R</i> ,6 <i>S</i> ,7 <i>E</i> ,14 <i>S</i> ,18 <i>R</i> )- <i>N</i> -cyclopropylsulfonyl-14-[(5-methylpyrazine-2-carbonyl)amino]-2,15-dioxo-18-phenanthridin-6-yloxy-3,16-diazatricyclo[14.3.0.0 <sup>4,6</sup> ]nonadec-7-ene-4-carboxamide                                                                                            |
| CID 117625846 | (1 <i>R</i> ,18 <i>R</i> ,20 <i>R</i> ,24 <i>S</i> ,27 <i>S</i> )-24-cyclohexyl- <i>N</i> -[(3 <i>S</i> )-3-ethyl-1-[(1-methylcyclopropyl)sulfonylamino]-1-oxopent-4-en-2-yl]-22,25-dioxo-11-pyridin-4-yl-2,21-dioxa-4,23,26-triazapentacyclo[24.2.1.0 <sup>3,12</sup> .0 <sup>5,10</sup> .0 <sup>18,20</sup> ]nonacos-3,5,7,9,11-pentaene-27-carboxamide |
| CID 87471819  | <i>N</i> -ethylethanamine;(1 <i>S</i> ,4 <i>R</i> ,6 <i>S</i> ,7 <i>E</i> ,14 <i>S</i> ,18 <i>R</i> )-14-[(5-methylpyrazine-2-carbonyl)amino]-2,15-dioxo-18-phenanthridin-6-yloxy-3,16-diazatricyclo[14.3.0.0 <sup>4,6</sup> ]nonadec-7-ene-4-carboxylic acid                                                                                             |
| CID 87473750  | 3- <i>O</i> - <i>tert</i> -butyl 4- <i>O</i> -ethyl (1 <i>S</i> ,4 <i>R</i> ,6 <i>S</i> ,7 <i>E</i> ,14 <i>S</i> ,18 <i>R</i> )-14-[(5-methylpyrazine-2-carbonyl)amino]-2,15-dioxo-18-phenanthridin-6-yloxy-3,16-diazatricyclo[14.3.0.0 <sup>4,6</sup> ]nonadec-7-ene-3,4-dicarboxylate                                                                   |
| CID 23595490  | <i>N</i> -[1-[2-[[1-(cyclopropylsulfonylcarbamoyl)-2-ethenylcyclopropyl]carbamoyl]-4-(6-methoxyisoquinolin-1-yl)oxypyrrolidin-1-yl]-3,3-dimethyl-1-oxobutan-2-yl]pyrazine-2-carboxamide                                                                                                                                                                   |

|               |                                                                                                                                                                                                                                                                                         |
|---------------|-----------------------------------------------------------------------------------------------------------------------------------------------------------------------------------------------------------------------------------------------------------------------------------------|
| CID 16075909  | <i>N</i> -[(2 <i>S</i> )-1-[(2 <i>S</i> ,4 <i>R</i> )-2-[[ <i>(1R</i> ,2 <i>S</i> )-1-(cyclopropylsulfonylcarbamoyl)-2-ethenylcyclopropyl]carbamoyl]-4-(6-methoxyisoquinolin-1-yl)oxypyrrolidin-1-yl]-3,3-dimethyl-1-oxobutan-2-yl]pyrazine-2-carboxamide                               |
| CID 58594019  | <i>tert</i> -butyl (2 <i>S</i> ,4 <i>R</i> )-2-[[ <i>(1R</i> ,2 <i>S</i> )-1-(cyclopropylsulfonylcarbamoyl)-2-ethenylcyclopropyl]carbamoyl]-4-(3-pyridin-4-ylisoquinolin-1-yl)oxypyrrolidine-1-carboxylate                                                                              |
| CID 68500752  | (1 <i>R</i> ,2 <i>S</i> )-2-ethenyl-2-ethyl-1-[(2-methylpropan-2-yl)oxycarbonyl]-[(2 <i>S</i> ,4 <i>R</i> )-1-[2-[(5-methylpyrazine-2-carbonyl)amino]non-8-enoyl]-4-phenanthridin-6-yloxy]pyrrolidine-2-carbonyl]amino]cyclopropane-1-carboxylic acid                                   |
| CID 67296958  | (1 <i>R</i> ,2 <i>S</i> )-2-ethenyl-2-ethyl-1-[(2-methylpropan-2-yl)oxycarbonyl]-[(2 <i>S</i> ,4 <i>R</i> )-1-[(2 <i>S</i> )-2-[(5-methylpyrazine-2-carbonyl)amino]non-8-enoyl]-4-phenanthridin-6-yloxy]pyrrolidine-2-carbonyl]amino]cyclopropane-1-carboxylic acid                     |
| CID 129900715 | <i>N</i> -[2-[(1 <i>S</i> ,4 <i>R</i> ,6 <i>S</i> ,7 <i>Z</i> ,14 <i>R</i> ,18 <i>R</i> )-4-(2-cyclopropylsulfonylacetyl)-2,15-dioxo-18-phenanthridin-6-yloxy-3,16-diazatricyclo[14.3.0.0 <sup>4,6</sup> ]nonadec-7-en-14-yl]acetyl]-5-methylpyrazine-2-carboxamide                     |
| CID 23595731  | <i>tert</i> -butyl 2-[[1-(cyclopropylsulfonylcarbamoyl)-2-ethenylcyclopropyl]carbamoyl]-4-(3-pyridin-4-ylisoquinolin-1-yl)oxypyrrolidine-1-carboxylate                                                                                                                                  |
| CID 68498890  | 3- <i>O</i> - <i>tert</i> -butyl 4- <i>O</i> -ethyl (1 <i>S</i> ,4 <i>R</i> ,6 <i>S</i> ,7 <i>Z</i> ,14 <i>S</i> ,18 <i>R</i> )-14-[(5-methylpyrazine-2-carbonyl)amino]-2,15-dioxo-18-phenanthridin-6-yloxy-3,16-diazatricyclo[14.3.0.0 <sup>4,6</sup> ]nonadec-7-ene-3,4-dicarboxylate |
| CID 67983962  | ethyl (1 <i>S</i> ,4 <i>R</i> ,6 <i>S</i> ,7 <i>Z</i> ,14 <i>S</i> ,18 <i>R</i> )-14-[(5-methylpyrazine-2-carbonyl)amino]-2,15-dioxo-18-phenanthridin-6-yloxy-3,16-diazatricyclo[14.3.0.0 <sup>4,6</sup> ]nonadec-7-ene-4-carboxylate                                                   |
| CID 87471820  | (1 <i>S</i> ,4 <i>R</i> ,6 <i>S</i> ,7 <i>E</i> ,14 <i>S</i> ,18 <i>R</i> )-14-[(5-methylpyrazine-2-carbonyl)amino]-2,15-dioxo-18-phenanthridin-6-yloxy-3,16-diazatricyclo[14.3.0.0 <sup>4,6</sup> ]nonadec-7-ene-4-carboxylic acid                                                     |
| CID 58594100  | <i>N</i> -[(2 <i>S</i> )-1-[(2 <i>S</i> )-2-[[ <i>(1R</i> ,2 <i>S</i> )-1-(cyclopropylsulfonylcarbamoyl)-2-ethenylcyclopropyl]carbamoyl]-4-(6-methoxyisoquinolin-1-yl)oxypyrrolidin-1-yl]-3,3-dimethyl-1-oxobutan-2-yl]pyrazine-2-carboxamide                                           |

|               |                                                                                                                                                                                                                                                              |
|---------------|--------------------------------------------------------------------------------------------------------------------------------------------------------------------------------------------------------------------------------------------------------------|
| CID 87472503  | (1 <i>S</i> ,4 <i>R</i> ,6 <i>S</i> ,7 <i>E</i> ,14 <i>S</i> ,18 <i>R</i> )- <i>N</i> -cyclopropylsulfonyl-2,15-dioxo-18-phenanthridin-6-yloxy-14-(pyridazine-4-carbonylamino)-3,16-diazatricyclo[14.3.0.0 <sup>4,6</sup> ]nonadec-7-ene-4-carboxamide       |
| CID 68496037  | ethyl (1 <i>S</i> ,4 <i>R</i> ,6 <i>S</i> ,7 <i>Z</i> ,14 <i>S</i> ,18 <i>R</i> )-14-[(5-methylpyrazine-2-carbonyl)amino]-2,15-dioxo-18-phenanthridin-6-yloxy-3,16-diazatricyclo[14.3.0.0 <sup>4,6</sup> ]nonadec-7-ene-4-carboxylate;hydrochloride          |
| CID 87472307  | (1 <i>S</i> ,4 <i>R</i> ,6 <i>S</i> ,7 <i>E</i> ,14 <i>S</i> ,18 <i>R</i> )-19-ethyl-14-[(5-methylpyrazine-2-carbonyl)amino]-2,15-dioxo-18-phenanthridin-6-yloxy-3,16-diazatricyclo[14.3.0.0 <sup>4,6</sup> ]nonadec-7-ene-4-carboxylic acid                 |
| CID 67296951  | ethyl (1 <i>R</i> ,2 <i>S</i> )-2-ethenyl-1-[(2-methylpropan-2-yl)oxycarbonyl]-[(2 <i>S</i> ,4 <i>R</i> )-1-[(2 <i>S</i> )-2-[(5-methylpyrazine-2-carbonyl)amino]non-8-enoyl]-4-phenanthridin-6-yloxypyrrolidine-2-carbonyl]amino]cyclopropane-1-carboxylate |
| CID 141228784 | ethyl (2 <i>S</i> )-2-ethenyl-1-[(2-methylpropan-2-yl)oxycarbonyl]-[(2 <i>S</i> ,4 <i>R</i> )-1-[2-[(5-methylpyrazine-2-carbonyl)amino]non-8-enoyl]-4-phenanthridin-6-yloxypyrrolidine-2-carbonyl]amino]cyclopropane-1-carboxylate                           |
| CID 67296803  | 2-ethenyl-1-[[[(2 <i>S</i> )-2-[(5-methylpyrazine-2-carbonyl)amino]non-8-enoyl]-[(2 <i>S</i> ,4 <i>R</i> )-4-phenanthridin-6-yloxypyrrolidine-2-carbonyl]amino]cyclopropane-1-carboxylic acid                                                                |
| CID 58594022  | (2 <i>S</i> ,4 <i>R</i> )- <i>N</i> -[(1 <i>R</i> ,2 <i>S</i> )-1-(cyclopropylsulfonylcarbamoyl)-2-ethenylcyclopropyl]-4-(3-pyrazin-2-yloxyquinolin-1-yl)oxypyrrolidine-2-carboxamide                                                                        |
| CID 58593964  | <i>tert</i> -butyl (2 <i>S</i> ,4 <i>R</i> )-2-[[[(1 <i>R</i> ,2 <i>S</i> )-1-(cyclopropylsulfonylcarbamoyl)-2-ethenylcyclopropyl]carbamoyl]-4-(3-pyrazin-2-yloxyquinolin-1-yl)oxypyrrolidine-1-carboxylate                                                  |
| CID 67296808  | 2-ethenyl-1-[[[(2 <i>S</i> ,4 <i>R</i> )-1-[(2 <i>S</i> )-2-[(5-methylpyrazine-2-carbonyl)amino]non-8-enoyl]-4-phenanthridin-6-yloxypyrrolidine-2-carbonyl]amino]cyclopropane-1-carboxylic acid                                                              |
| CID 68494544  | (1 <i>S</i> ,4 <i>R</i> ,6 <i>S</i> ,7 <i>Z</i> ,14 <i>S</i> ,18 <i>R</i> )-14-[(5-methylpyrazine-2-carbonyl)amino]-2,15-dioxo-18-phenanthridin-6-yloxy-3,16-diazatricyclo[14.3.0.0 <sup>4,6</sup> ]nonadec-7-ene-4-carboxylic acid                          |

|               |                                                                                                                                                                                                                                            |
|---------------|--------------------------------------------------------------------------------------------------------------------------------------------------------------------------------------------------------------------------------------------|
| CID 68496262  | 2-ethenyl-1-[[ <i>(2S,4R)</i> -1-[2-[(5-methylpyrazine-2-carbonyl)amino]non-8-enoyl]-4-phenanthridin-6-yloxy]pyrrolidine-2-carbonyl]amino]cyclopropane-1-carboxylic acid                                                                   |
| CID 135001966 | ethyl ( <i>1R,2S</i> )-2-ethenyl-1-[[ <i>(2S,4R)</i> -1-[( <i>2S</i> )-2-[(2-methylpropan-2-yl)oxycarbonyl-(5-methylpyrazine-2-carbonyl)amino]non-8-enoyl]-4-phenanthridin-6-yloxy]pyrrolidine-2-carbonyl]amino]cyclopropane-1-carboxylate |
| CID 23595521  | <i>N</i> -[1-(cyclopropylsulfonylcarbamoyl)-2-ethenylcyclopropyl]-4-(3-pyrazin-2-ylisoquinolin-1-yl)oxypyrrolidine-2-carboxamide                                                                                                           |
| CID 23595734  | <i>tert</i> -butyl 2-[[1-(cyclopropylsulfonylcarbamoyl)-2-ethenylcyclopropyl]carbamoyl]-4-(3-pyrazin-2-ylisoquinolin-1-yl)oxypyrrolidine-1-carboxylate                                                                                     |
| CID 86660471  | ethyl ( <i>1R,2S</i> )-2-ethenyl-1-[[ <i>(2S,4R)</i> -1-[( <i>2S</i> )-2-[(5-methylpyrazine-2-carbonyl)amino]non-8-enoyl]-4-phenanthridin-6-yloxy]pyrrolidine-2-carbonyl]amino]cyclopropane-1-carboxylate                                  |
| CID 117804962 | <i>N</i> -[( <i>Z,2S</i> )-1-[( <i>2S,4R</i> )-2-carbamoyl-4-phenanthridin-6-yloxy]pyrrolidin-1-yl]-9-[( <i>1S,2S</i> )-2-(cyclopropylsulfonylcarbamoyl)cyclopropyl]-1-oxonon-8-en-2-yl]-5-methylpyrazine-2-carboxamide                    |
| CID 144881772 | <i>N</i> -cyclopropylsulfonylacetamide; <i>N</i> -[( <i>1S,4R,7Z,14S,18R</i> )-18-(7,8-dihydrophenanthridin-6-yloxy)-2,15-dioxo-3,16-diazatricyclo[14.3.0.0 <sup>4,6</sup> ]nonadec-7-en-14-yl]-5-methylpyrazine-2-carboxamide             |
| CID 68499875  | ( <i>1S,4R,6S,7Z,14S,18R</i> )-14-amino- <i>N</i> -cyclopropylsulfonyl-2,15-dioxo-18-phenanthridin-6-yloxy-3,16-diazatricyclo[14.3.0.0 <sup>4,6</sup> ]nonadec-7-ene-4-carboxamide;hydrochloride                                           |
| CID 87472306  | ( <i>1S,4R,6S,7E,14S,18R</i> )-19-ethyl-14-[(5-methylpyrazine-2-carbonyl)amino]-2,15-dioxo-18-phenanthridin-6-yloxy-3,16-diazatricyclo[14.3.0.0 <sup>4,6</sup> ]nonadec-7-ene-4-carboxylic acid;hydrochloride                              |
| CID 87474441  | ( <i>1S,4R,6S,7E,14S,18R</i> )-14-amino- <i>N</i> -cyclopropylsulfonyl-2,15-dioxo-18-phenanthridin-6-yloxy-3,16-diazatricyclo[14.3.0.0 <sup>4,6</sup> ]nonadec-7-ene-4-carboxamide;hydrochloride                                           |

**Table S3.** Molecular Docking Result of Protease Inhibitors with Binding Energy.

| <i>Main Protease Protein Inhibitors</i> | <i>Molecular Binding Affinity with SARS-COV-2 (kcal/mol)</i> |
|-----------------------------------------|--------------------------------------------------------------|
| Paritaprevir                            | -10.9                                                        |
| Glecaprevir                             | -9.3                                                         |
| Nelfinavir                              | -8.7                                                         |
| Simeprevir                              | -8.6                                                         |
| Lopinavir                               | -8.4                                                         |
| Ritonavir                               | -8.4                                                         |
| Telaprevir                              | -8.3                                                         |
| Grazoprevir                             | -8.3                                                         |
| Indinavir                               | -8.2                                                         |
| Amprenavir                              | -7.9                                                         |
| Atazanavir                              | -7.9                                                         |
| Darunavir                               | -7.9                                                         |
| Fosamprenavir                           | -7.9                                                         |
| Saquinavir                              | -7.9                                                         |
| Asunaprevir                             | -7.4                                                         |
| Boceprevir                              | -7.1                                                         |

**Table S4.** Molecular Docking Result of Paritaprevir derivatives.

| <i>Derivatives of Paritaprevir</i> | <i>Molecular Binding Affinity with SARS-COV-2 (kcal/mol)</i> | <i>Derivatives of Paritaprevir</i> | <i>Molecular Binding Affinity with SARS-COV-2 (kcal/mol)</i> | <i>Derivatives of Paritaprevir</i> | <i>Molecular Binding Affinity with SARS-COV-2 (kcal/mol)</i> |
|------------------------------------|--------------------------------------------------------------|------------------------------------|--------------------------------------------------------------|------------------------------------|--------------------------------------------------------------|
| CID 131982844                      | -16.3                                                        | CID132207185                       | -14.4                                                        | CID117625846                       | -12.8                                                        |
| CID 117860584                      | -16.1                                                        | CID 123457581                      | -14.4                                                        | CID87471819                        | -12.7                                                        |
| CID 144881776                      | -16.1                                                        | CID68494543                        | -14.3                                                        | CID87473750                        | -12.7                                                        |
| CID 144881777                      | -16                                                          | CID68494548                        | -14.3                                                        | CID 23595490                       | -12.7                                                        |
| CID 89997958                       | -15.5                                                        | CID140642415                       | -14.3                                                        | CID16075909                        | -12.6                                                        |
| CID 90479564                       | -15.2                                                        | CID144411760                       | -14.3                                                        | CID58594019                        | -12.6                                                        |
| CID 117930281                      | -15.2                                                        | CID144411796                       | -14.3                                                        | CID68500752                        | -12.6                                                        |
| CID 126760198                      | -15.2                                                        | CID 123172379                      | -14.3                                                        | CID67296958                        | -12.5                                                        |
| CID 130368695                      | -15.2                                                        | CID58001490                        | -14.2                                                        | CID129900715                       | -12.5                                                        |
| CID 129606829                      | -15.2                                                        | CID123747270                       | -14.2                                                        | CID 23595731                       | -12.5                                                        |
| CID 134503655                      | -15.2                                                        | CID139598190                       | -14.2                                                        | CID68498890                        | -12.4                                                        |
| CID 91971755                       | -15.2                                                        | CID 77506125                       | -14.2                                                        | CID 67983962                       | -12.4                                                        |
| CID129190351                       | -15.1                                                        | CID87473268                        | -14.1                                                        | CID 87471820                       | -12.4                                                        |
| CID134689630                       | -15.1                                                        | CID133548468                       | -14.1                                                        | CID68499875                        | -12.1                                                        |
| CID 76528926                       | -15.1                                                        | CID123942813                       | -14                                                          | CID58594100                        | -12                                                          |
| CID57415626                        | -14.9                                                        | CID 68499876                       | -13.9                                                        | CID87472503                        | -12                                                          |
| CID132247343                       | -14.9                                                        | CID143897349                       | -13.8                                                        | CID68496037                        | -11.7                                                        |
| CID 123539122                      | -14.9                                                        | CID 87474442                       | -13.8                                                        | CID 87472307                       | -11.6                                                        |
| CID68500653                        | -14.8                                                        | CID123706840                       | -13.7                                                        | CID67296951                        | -11.5                                                        |
| CID139266795                       | -14.8                                                        | CID123764424                       | -13.7                                                        | CID141228784                       | -11.5                                                        |
| CID140642412                       | -14.8                                                        | CID144881773                       | -13.7                                                        | CID 67296803                       | -11.4                                                        |
| CID 75093025                       | -14.8                                                        | CID44180178                        | -13.6                                                        | CID58594022                        | -11.2                                                        |
| CID 123207199                      | -14.8                                                        | CID131982843                       | -13.6                                                        | CID58593964                        | -11.1                                                        |
| CID45110641                        | -14.7                                                        | CID 73211765                       | -13.5                                                        | CID67296808                        | -11.1                                                        |
| CID126970090                       | -14.7                                                        | CID 89997539                       | -13.5                                                        | CID 68494544                       | -11.1                                                        |
| CID134693118                       | -14.7                                                        | CID 123658396                      | -13.4                                                        | CID68496262                        | -11                                                          |
| CID145142292                       | -14.7                                                        | CID16075882                        | -13.3                                                        | CID135001966                       | -10.8                                                        |
| CID134322927                       | -14.7                                                        | CID 23595603                       | -13.3                                                        | CID 23595521                       | -10.8                                                        |
| CID 67985746                       | -14.7                                                        | CID 123202053                      | -13.2                                                        | CID 23595734                       | -10.4                                                        |
| CID 68496388                       | -14.7                                                        | CID87472306                        | -13.2                                                        | CID86660471                        | -10.1                                                        |
| CID45110639                        | -14.6                                                        | CID87476180                        | -13                                                          | CID 117804962                      | -8.7                                                         |
| CID144678769                       | -14.6                                                        | CID87474441                        | -12.9                                                        | CID144881772                       | -5.6                                                         |
| CID68498031                        | -14.4                                                        | CID87475090                        | -12.8                                                        |                                    |                                                              |

**Table S5.** ADME analysis of top ten Paritaprevir derivatives by using SwissADME.

| Parameter                          |                                      | PubChem ID of Paritaprevir derivatives |                                    |                                    |                                    |                                    |                                    |                                    |                                    |                                    |                                    |
|------------------------------------|--------------------------------------|----------------------------------------|------------------------------------|------------------------------------|------------------------------------|------------------------------------|------------------------------------|------------------------------------|------------------------------------|------------------------------------|------------------------------------|
|                                    |                                      | CID<br>131982844                       | CID<br>117860584                   | CID<br>144881776                   | CID<br>144881777                   | CID<br>89997958                    | CID<br>90479564                    | CID<br>117930281                   | CID<br>126760198                   | CID<br>130368695                   | CID<br>129606829                   |
| <b>Physico-chemical parameters</b> | Formula                              | C40H45N7O7S                            | C39H41F2N7O7S                      | C41H45N7O7S                        | C41H45N7O7S                        | C39H41N7O7S                        | C40H47N7O9S                        | C40H43N7O7S                        | C40H43N7O7S                        | C40H43N7O7S                        | C40H43N7O7S                        |
|                                    | Molecular weight                     | 767.89 g/mol                           | 789.85 g/mol                       | 779.90 g/mol                       | 779.90 g/mol                       | 751.85 g/mol                       | 801.91 g/mol                       | 765.88 g/mol                       | 765.88 g/mol                       | 765.88 g/mol                       | 765.88 g/mol                       |
|                                    | Molar Refractivity                   | 214.07                                 | 208.36                             | 216.76                             | 216.76                             | 206.99                             | 218.05                             | 211.96                             | 211.96                             | 211.96                             | 211.96                             |
|                                    | TPSA                                 | 198.03 Å <sup>2</sup>                  | 190.07 Å <sup>2</sup>              | 198.03 Å <sup>2</sup>              | 198.03 Å <sup>2</sup>              | 198.03 Å <sup>2</sup>              | 216.49 Å <sup>2</sup>              | 198.03 Å <sup>2</sup>              | 198.03 Å <sup>2</sup>              | 198.03 Å <sup>2</sup>              | 198.03 Å <sup>2</sup>              |
| <b>Lipophilicity</b>               | Log P <sub>o/w</sub> (iLOGP)         | 3.82                                   | 3.54                               | 2.97                               | 4.04                               | 2.37                               | 3.37                               | 2.33                               | 3.12                               | 5.53                               | 3.22                               |
|                                    | Log P <sub>o/w</sub> (XLOGP3)        | 5.1                                    | 4.57                               | 4.67                               | 4.67                               | 4.25                               | 3.7                                | 4.65                               | 4.65                               | 4.65                               | 4.65                               |
|                                    | Log P <sub>o/w</sub> (WLOGP)         | 4.28                                   | 4.65                               | 4.43                               | 4.43                               | 3.58                               | 3.76                               | 3.89                               | 3.89                               | 3.89                               | 3.89                               |
|                                    | Log P <sub>o/w</sub> (MLOGP)         | 0.88                                   | 2.26                               | 1.05                               | 1.05                               | 0.71                               | -0.59                              | 0.88                               | 0.88                               | 0.88                               | 0.88                               |
|                                    | Log P <sub>o/w</sub> (SILICOS-IT)    | 2.59                                   | 2.18                               | 2.91                               | 2.91                               | 1.74                               | 2.28                               | 2.28                               | 2.28                               | 2.28                               | 2.28                               |
|                                    | Consensus Log P <sub>o/w</sub>       | 3.33                                   | 3.44                               | 3.2                                | 3.42                               | 2.53                               | 2.51                               | 2.81                               | 2.96                               | 3.45                               | 2.98                               |
| <b>Pharmacokinetics Water</b>      | GI absorption                        | Low                                    | Low                                | Low                                | Low                                | Low                                | Low                                | Low                                | Low                                | Low                                | Low                                |
|                                    | BBB permeant                         | No                                     | No                                 | No                                 | No                                 | No                                 | No                                 | No                                 | No                                 | No                                 | No                                 |
|                                    | P-gp substrate                       | Yes                                    | Yes                                | Yes                                | Yes                                | Yes                                | Yes                                | Yes                                | Yes                                | Yes                                | Yes                                |
|                                    | CYP1A2 inhibitor                     | No                                     | No                                 | No                                 | No                                 | No                                 | No                                 | No                                 | No                                 | No                                 | No                                 |
|                                    | CYP2C19 inhibitor                    | No                                     | No                                 | No                                 | No                                 | No                                 | No                                 | No                                 | No                                 | No                                 | No                                 |
|                                    | CYP2C9 inhibitor                     | No                                     | No                                 | No                                 | No                                 | Yes                                | No                                 | No                                 | No                                 | No                                 | No                                 |
|                                    | CYP2D6 inhibitor                     | No                                     | No                                 | No                                 | No                                 | No                                 | No                                 | No                                 | No                                 | No                                 | No                                 |
|                                    | CYP3A4 inhibitor                     | Yes                                    | No                                 | Yes                                |
|                                    | Log K <sub>p</sub> (skin permeation) | -7.36 cm/s                             | -7.87 cm/s                         | -7.74 cm/s                         | -7.74 cm/s                         | -7.87 cm/s                         | -8.56 cm/s                         | -7.67 cm/s                         | -7.67 cm/s                         | -7.67 cm/s                         | -7.67 cm/s                         |
|                                    | Log S (SILICOS-IT)                   | -10.09                                 | -9.02                              | -10.45                             | -10.45                             | -9.38                              | -9.74                              | -9.74                              | -9.74                              | -9.74                              | -9.74                              |
| <b>Water Solubility</b>            | Solubility                           | 6.30e-08 mg/ml ;<br>8.20e-11 mol/l     | 7.53e-07 mg/ml ;<br>9.53e-10 mol/l | 2.77e-08 mg/ml ;<br>3.56e-11 mol/l | 2.77e-08 mg/ml ;<br>3.56e-11 mol/l | 3.15e-07 mg/ml ;<br>4.19e-10 mol/l | 1.45e-07 mg/ml ;<br>1.81e-10 mol/l | 1.38e-07 mg/ml ;<br>1.81e-10 mol/l |































pdb | 5RH9 | YEPLTQDHVDILGPLSAQTGIAVLDMCASLKELLQNGMNGRTILGSALLEDEFTPFDVVR  
pdb | 5RH8 | YEPLTQDHVDILGPLSAQTGIAVLDMCASLKELLQNGMNGRTILGSALLEDEFTPFDVVR  
pdb | 5RH7 | YEPLTQDHVDILGPLSAQTGIAVLDMCASLKELLQNGMNGRTILGSALLEDEFTPFDVVR  
pdb | 5RH6 | YEPLTQDHVDILGPLSAQTGIAVLDMCASLKELLQNGMNGRTILGSALLEDEFTPFDVVR  
pdb | 5RH5 | YEPLTQDHVDILGPLSAQTGIAVLDMCASLKELLQNGMNGRTILGSALLEDEFTPFDVVR  
pdb | 5RH4 | YEPLTQDHVDILGPLSAQTGIAVLDMCASLKELLQNGMNGRTILGSALLEDEFTPFDVVR  
pdb | 5RH3 | YEPLTQDHVDILGPLSAQTGIAVLDMCASLKELLQNGMNGRTILGSALLEDEFTPFDVVR  
pdb | 5RH2 | YEPLTQDHVDILGPLSAQTGIAVLDMCASLKELLQNGMNGRTILGSALLEDEFTPFDVVR  
pdb | 5RH1 | YEPLTQDHVDILGPLSAQTGIAVLDMCASLKELLQNGMNGRTILGSALLEDEFTPFDVVR  
pdb | 5RH0 | YEPLTQDHVDILGPLSAQTGIAVLDMCASLKELLQNGMNGRTILGSALLEDEFTPFDVVR  
pdb | 5RGZ | YEPLTQDHVDILGPLSAQTGIAVLDMCASLKELLQNGMNGRTILGSALLEDEFTPFDVVR  
pdb | 5RGY | YEPLTQDHVDILGPLSAQTGIAVLDMCASLKELLQNGMNGRTILGSALLEDEFTPFDVVR  
pdb | 5RGX | YEPLTQDHVDILGPLSAQTGIAVLDMCASLKELLQNGMNGRTILGSALLEDEFTPFDVVR  
pdb | 5RGW | YEPLTQDHVDILGPLSAQTGIAVLDMCASLKELLQNGMNGRTILGSALLEDEFTPFDVVR  
pdb | 5RGV | YEPLTQDHVDILGPLSAQTGIAVLDMCASLKELLQNGMNGRTILGSALLEDEFTPFDVVR  
pdb | 5RGU | YEPLTQDHVDILGPLSAQTGIAVLDMCASLKELLQNGMNGRTILGSALLEDEFTPFDVVR  
pdb | 5RGT | YEPLTQDHVDILGPLSAQTGIAVLDMCASLKELLQNGMNGRTILGSALLEDEFTPFDVVR  
pdb | 6WQF | YEPLTQDHVDILGPLSAQTGIAVLDMCASLKELLQNGMNGRTILGSALLEDEFTPFDVVR  
pdb | 5RHF | YEPLTQDHVDILGPLSAQTGIAVLDMCASLKELLQNGMNGRTILGSALLEDEFTPFDVVR  
pdb | 5RHE | YEPLTQDHVDILGPLSAQTGIAVLDMCASLKELLQNGMNGRTILGSALLEDEFTPFDVVR  
pdb | 6W63 | YEPLTQDHVDILGPLSAQTGIAVLDMCASLKELLQNGMNGRTILGSALLEDEFTPFDVVR  
pdb | 5R84 | YEPLTQDHVDILGPLSAQTGIAVLDMCASLKELLQNGMNGRTILGSALLEDEFTPFDVVR  
pdb | 5R82 | YEPLTQDHVDILGPLSAQTGIAVLDMCASLKELLQNGMNGRTILGSALLEDEFTPFDVVR  
pdb | 5R81 | YEPLTQDHVDILGPLSAQTGIAVLDMCASLKELLQNGMNGRTILGSALLEDEFTPFDVVR  
pdb | 5R7Y | YEPLTQDHVDILGPLSAQTGIAVLDMCASLKELLQNGMNGRTILGSALLEDEFTPFDVVR  
pdb | 6YZ6 | YEPLTQDHVDILGPLSAQTGIAVLDMCASLKELLQNGMNGRTILGSALLEDEFTPFDVVR  
pdb | 6XCH | YEPLTQDHVDILGPLSAQTGIAVLDMCASLKELLQNGMNGRTILGSALLEDEFTPFDVVR  
pdb | 6YT8 | YEPLTQDHVDILGPLSAQTGIAVLDMCASLKELLQNGMNGRTILGSALLEDEFTPFDVVR  
pdb | 6YNQ | YEPLTQDHVDILGPLSAQTGIAVLDMCASLKELLQNGMNGRTILGSALLEDEFTPFDVVR  
pdb | 6YVF | YEPLTQDHVDILGPLSAQTGIAVLDMCASLKELLQNGMNGRTILGSALLEDEFTPFDVVR  
pdb | 6WTK | YEPLTQDHVDILGPLSAQTGIAVLDMCASLKELLQNGMNGRTILGSALLEDEFTPFDVVR  
pdb | 6WTJ | YEPLTQDHVDILGPLSAQTGIAVLDMCASLKELLQNGMNGRTILGSALLEDEFTPFDVVR  
pdb | 6XB2 | YEPLTQDHVDILGPLSAQTGIAVLDMCASLKELLQNGMNGRTILGSALLEDEFTPFDVVR  
pdb | 7C8U | YEPLTQDHVDILGPLSAQTGIAVLDMCASLKELLQNGMNGRTILGSALLEDEFTPFDVVR  
pdb | 7BRR | YEPLTQDHVDILGPLSAQTGIAVLDMCASLKELLQNGMNGRTILGSALLEDEFTPFDVVR  
pdb | 7BRP | YEPLTQDHVDILGPLSAQTGIAVLDMCASLKELLQNGMNGRTILGSALLEDEFTPFDVVR  
pdb | 7BRO | YEPLTQDHVDILGPLSAQTGIAVLDMCASLKELLQNGMNGRTILGSALLEDEFTPFDVVR  
\*\*\*\*\*

pdb | 6WTT | QCSGVTHHHHHH  
pdb | 6XG2 | QCSGVTFQ----  
pdb | 6XB1 | QCSGVTFQ----  
pdb | 6XB0 | QCSGVTFQ----  
pdb | 6XBI | QCSGVTFQ----  
pdb | 6XBG | QCSGVTFQ----  
pdb | 6XBH | QCSGVTFQ----  
pdb | 6XFN | QCSGVTFQ----  
pdb | 6XA4 | QCSGVTFQ----  
pdb | 6M0K | QCSGVT-----  
pdb | 6LZE | QCSGV-----  
pdb | 6M2N | QCSGVTFQ----  
pdb | 6Y2G | QCSGVTFQ----  
pdb | 6WTM | QCSGVTFQ----  
pdb | 7BUY | QCSGVTFQ----  
pdb | 6Y2F | QCSGVTFQ----  
pdb | 6Y2E | QCSGVTFQ----  
pdb | 7BQY | QCSGVTFQ----

|            |               |
|------------|---------------|
| pdb   6LU7 | QCSGVTFQ----- |
| pdb   5RGS | QCSGVTFQ----- |
| pdb   5RGR | QCSGVTFQ----- |
| pdb   5RGQ | QCSGVTFQ----- |
| pdb   5RGP | QCSGVTFQ----- |
| pdb   5RGO | QCSGVTFQ----- |
| pdb   5RGN | QCSGVTFQ----- |
| pdb   5RGM | QCSGVTFQ----- |
| pdb   5RGL | QCSGVTFQ----- |
| pdb   5RGK | QCSGVTFQ----- |
| pdb   5RGJ | QCSGVTFQ----- |
| pdb   5RGI | QCSGVTFQ----- |
| pdb   5RGH | QCSGVTFQ----- |
| pdb   5RGG | QCSGVTFQ----- |
| pdb   5RG3 | QCSGVTFQ----- |
| pdb   5RG2 | QCSGVTFQ----- |
| pdb   5RG1 | QCSGVTFQ----- |
| pdb   6M2Q | QCSGVTFQ----- |
| pdb   6WNP | QCSGVTFQ----- |
| pdb   5R83 | QCSGVTFQ----- |
| pdb   5R80 | QCSGVTFQ----- |
| pdb   5R7Z | QCSGVTFQ----- |
| pdb   6YB7 | QCSGVTFQ----- |
| pdb   5R8T | QCSGVTFQ----- |
| pdb   5RG0 | QCSGVTFQ----- |
| pdb   5RFZ | QCSGVTFQ----- |
| pdb   5RFY | QCSGVTFQ----- |
| pdb   5RFX | QCSGVTFQ----- |
| pdb   5RFW | QCSGVTFQ----- |
| pdb   5RFV | QCSGVTFQ----- |
| pdb   5RFU | QCSGVTFQ----- |
| pdb   5RFT | QCSGVTFQ----- |
| pdb   5RFS | QCSGVTFQ----- |
| pdb   5RFR | QCSGVTFQ----- |
| pdb   5RFQ | QCSGVTFQ----- |
| pdb   5RFP | QCSGVTFQ----- |
| pdb   5RFO | QCSGVTFQ----- |
| pdb   5RFN | QCSGVTFQ----- |
| pdb   5RFM | QCSGVTFQ----- |
| pdb   5RFL | QCSGVTFQ----- |
| pdb   5RFK | QCSGVTFQ----- |
| pdb   5RFJ | QCSGVTFQ----- |
| pdb   5RFI | QCSGVTFQ----- |
| pdb   5RFH | QCSGVTFQ----- |
| pdb   5RFG | QCSGVTFQ----- |
| pdb   5RFF | QCSGVTFQ----- |
| pdb   5RFB | QCSGVTFQ----- |
| pdb   5RFE | QCSGVTFQ----- |
| pdb   5RFD | QCSGVTFQ----- |
| pdb   5RFC | QCSGVTFQ----- |
| pdb   5RFA | QCSGVTFQ----- |
| pdb   5RF9 | QCSGVTFQ----- |
| pdb   5RF8 | QCSGVTFQ----- |
| pdb   5RF7 | QCSGVTFQ----- |
| pdb   5RF6 | QCSGVTFQ----- |
| pdb   5RF5 | QCSGVTFQ----- |
| pdb   5RF0 | QCSGVTFQ----- |

|            |               |
|------------|---------------|
| pdb   5RF1 | QCSGVTFQ----- |
| pdb   5RF2 | QCSGVTFQ----- |
| pdb   5RF3 | QCSGVTFQ----- |
| pdb   5RF4 | QCSGVTFQ----- |
| pdb   5REZ | QCSGVTFQ----- |
| pdb   5REY | QCSGVTFQ----- |
| pdb   5REX | QCSGVTFQ----- |
| pdb   5REW | QCSGVTFQ----- |
| pdb   5REV | QCSGVTFQ----- |
| pdb   5REU | QCSGVTFQ----- |
| pdb   5RET | QCSGVTFQ----- |
| pdb   5RES | QCSGVTFQ----- |
| pdb   5RER | QCSGVTFQ----- |
| pdb   5REP | QCSGVTFQ----- |
| pdb   5REO | QCSGVTFQ----- |
| pdb   5REN | QCSGVTFQ----- |
| pdb   5REM | QCSGVTFQ----- |
| pdb   5REL | QCSGVTFQ----- |
| pdb   5REK | QCSGVTFQ----- |
| pdb   5REJ | QCSGVTFQ----- |
| pdb   5REI | QCSGVTFQ----- |
| pdb   5REH | QCSGVTFQ----- |
| pdb   5REG | QCSGVTFQ----- |
| pdb   5REF | QCSGVTFQ----- |
| pdb   5REE | QCSGVTFQ----- |
| pdb   5RED | QCSGVTFQ----- |
| pdb   5REC | QCSGVTFQ----- |
| pdb   5REB | QCSGVTFQ----- |
| pdb   5REA | QCSGVTFQ----- |
| pdb   5RE9 | QCSGVTFQ----- |
| pdb   5RE8 | QCSGVTFQ----- |
| pdb   5RE7 | QCSGVTFQ----- |
| pdb   5RE6 | QCSGVTFQ----- |
| pdb   5RE5 | QCSGVTFQ----- |
| pdb   5RE4 | QCSGVTFQ----- |
| pdb   6Y84 | QCSGVTFQ----- |
| pdb   6M03 | QCSGVTFQ----- |
| pdb   5RHD | QCSGVTFQ----- |
| pdb   5RHC | QCSGVTFQ----- |
| pdb   5RHB | QCSGVTFQ----- |
| pdb   5RHA | QCSGVTFQ----- |
| pdb   5RH9 | QCSGVTFQ----- |
| pdb   5RH8 | QCSGVTFQ----- |
| pdb   5RH7 | QCSGVTFQ----- |
| pdb   5RH6 | QCSGVTFQ----- |
| pdb   5RH5 | QCSGVTFQ----- |
| pdb   5RH4 | QCSGVTFQ----- |
| pdb   5RH3 | QCSGVTFQ----- |
| pdb   5RH2 | QCSGVTFQ----- |
| pdb   5RH1 | QCSGVTFQ----- |
| pdb   5RH0 | QCSGVTFQ----- |
| pdb   5RGZ | QCSGVTFQ----- |
| pdb   5RGY | QCSGVTFQ----- |
| pdb   5RGX | QCSGVTFQ----- |
| pdb   5RGW | QCSGVTFQ----- |
| pdb   5RGV | QCSGVTFQ----- |
| pdb   5RGU | QCSGVTFQ----- |

|            |               |
|------------|---------------|
| pdb   5RGT | QCSGVTFQ----- |
| pdb   6WQF | QCSGVTFQ----- |
| pdb   5RHF | QCSGVTFQ----- |
| pdb   5RHE | QCSGVTFQ----- |
| pdb   6W63 | QCSGVTFQ----- |
| pdb   5R84 | QCSGVTFQ----- |
| pdb   5R82 | QCSGVTFQ----- |
| pdb   5R81 | QCSGVTFQ----- |
| pdb   5R7Y | QCSGVTFQ----- |
| pdb   6YZ6 | QCSGVTFQ----- |
| pdb   6XCH | QCSGVTFQ----- |
| pdb   6YT8 | QCSGVTFQ----- |
| pdb   6YNQ | QCSGVTFQ----- |
| pdb   6YVF | QCSGVTFQ----- |
| pdb   6WTK | QCSGVTFQ----- |
| pdb   6WTJ | QCSGVTFQ----- |
| pdb   6XB2 | QCSGVTFQ----- |
| pdb   7C8U | QCSGVTFQ----- |
| pdb   7BRR | QCSGVTFQ----- |
| pdb   7BRP | QCSGVTFQ----- |
| pdb   7BRO | QCSGVTFQ----- |

\*\*\*\*\*
